# Supplementary material
Source: publisher figshare collection journal article supplement (https://karger.figshare.com/ndownloader/files/28746477)
Supplement: Supplementary file 1 [file 28746477]

**Table S3: Incidental findings (n = 3)**

| **ID** | **Gene** | **Diagnosis** | **Variant type** | **Variant** | **Zygosity** | **Inheritance** | **ACMG classification** | **Recommendation of medical management** |
| --- | --- | --- | --- | --- | --- | --- | --- | --- |
| 4 | *TRPM4*  (NM_017636.3) | progressive familial heart block  Typ IB (MIM#604559) | Missense | c.1550C>T  [p.(Pro517Leu)] , maternal  c.3226G>A  [p.(Ala1076Thr)], paternal | Compound heterozygous | AD | VUS /  VUS | Reverse phenotyping  Cardiovascular monitoring  Segregation of family members |
| 8 | *COL4A5*  (NM_000495.4) | Alport Syndrom  (MIM#301050) | Missense | c.530G>T  [p.(Gly177Val)], maternal | Hemizygous | XLD | LP | Reverse phenotyping  Nephrological diagnostic for family members  Confirmation of Alport Syndrome in the mother |
| 42 | *CACNA1C*  (NM_199460.2) | Long QT syndrome 8  (MIM#618447) | Missense | c.5509A>C  [p.(Ser1837Arg)] | Homozygous | AD | VUS | Reverse phenotyping  Cardiological surveillance, Cardiological examination and Segregation in family members |

Abbreviations: AR, autosomal-recessive; AD, autosomal-dominant; LP, likely pathogenic; VUS, variant of uncertain significance; XLD, X-linked dominant. MIM gene number from Online Mendelian inheritance in Man (Omim; [www.omim.org](http://www.omim.org))
